# Supplementary material for: Vitamin K2 protects against Aβ42-induced neurotoxicity by activating autophagy and improving mitochondrial function in Drosophila
Source: PubMed Central journal article supplement — Neuroreport. 2021 Mar 11;32(6):431–7. doi: 10.1097/WNR.0000000000001599 (PMC8016515; doi:10.1097/wnr.0000000000001599), 2021-03-11

Supplemental Fig.5 Vitamin K2 increased IDE and NEP1 expression. Normalized quantification of the IDE and NEP1 mRNA in flies, one-way ANOVA using Dunnett's test, compared with A307/Aβarc flies, p for A307/Aβarc+0.5mM K2 flies was #p < 0.05.

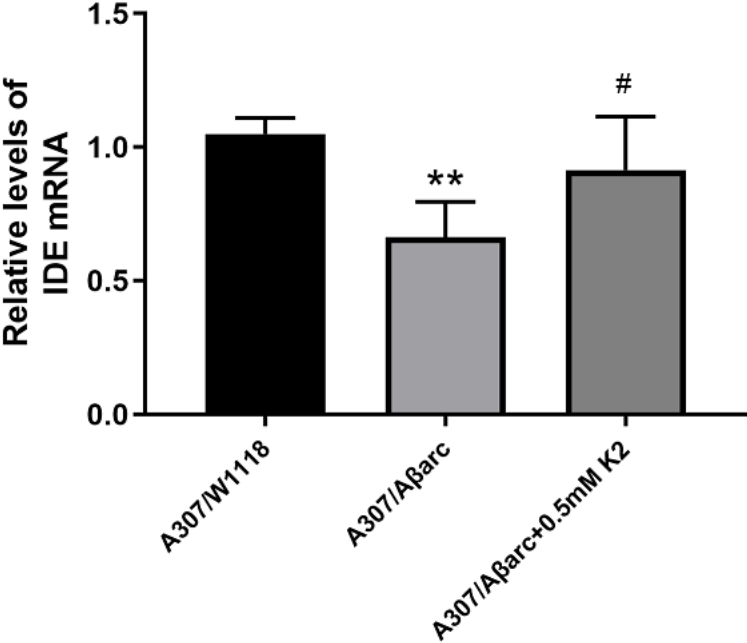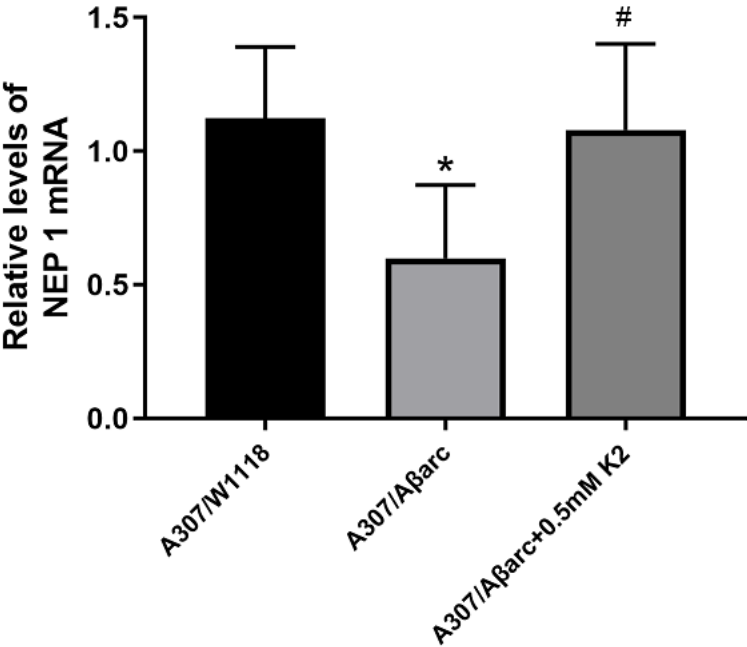

Supplement: nr-32-431-s001.pdf [file nr-32-431-s001.pdf]
